# Supplementary material for: Heterogeneity of neutrophils and inflammatory responses in patients with COVID-19 and healthy controls
Source: Front Immunol. 2022 Nov 16;13:970287. doi: 10.3389/fimmu.2022.970287 (PMC9709423; doi:10.3389/fimmu.2022.970287)
Supplement: Supplementary file 2 [file Table_1.xlsx]

## Sheet: Cytokine genes
IL2
IL7
CSF3
CXCL10
CCL2
CCL3
TNF
TFTN1
IL6
CCL7
CSF1
IFNG
IL2RA
IL18
HGF
CXCL9
CCL27
IL1B
LTA
CSF2
LTB
TNFSF13
IL4
CCL12
CXCL8
CXCL11
CCL4
CXCL1
CXCL2
CXCL3
CCL3L1
CCL8
CXCL16
IFNA1
CCL5
CCL11
IFNA2
CCL20
CCL4L2
OSM
TNFSF14
SA100A12
FGF19
CXCL5
CCL19
IL18R1
IFNB1
IL17C
TNFSF10
FGF7
XCL1
FGF13
LIF
TGFB3
INHBE
CERS1
TXLNA
IFNW1
IL22
XCL2
CCL25
CCL16
CD40LG
IL20
FASLG
TPO
SCYL3
PF4V1
TNFSF8
GDF15
IL1A
VEGFA
GDF7
BMP6
PDGFA
IL21
ABCD-1
ABCD-2
PDGFB
TNFSF4
FAM19A1
HBEGF
PDGFD
IL12RB2
GH1
VEGFB
MIP3B
IL27
PF4
BMP8B
TNFSF12
IL15
SCYL2
SCYL1
TSLP
GDF11
SDF1B
INHBA
PPBP
FGF11
IFNG-AS1
FGF22
VEGFC
CCL18
TNFSF11
IL12A
EBI3
AMH
IL26
IL32
PDGFC
FGF23
IGF1
IL1F11
CCL28
CLCF1
TNFSF9
BMP3
IL24
GDF10
CXCL6
GDF9
IL23A
IL16
CD70
IL5
FGF9
IFNL1
TSC1
FGF2
IL23R
IL1G
SPP1
IL12RB1
BMP4
IL13
TPAR1
FAM19A2
AGIF3
EDA
MIF
TNFSF13B
BMP7
FGF18
CCL23

## Sheet: inflammatory genes
ABCA1
ABI1
ACVR1B
ACVR2A
ADGRE1
ADM
ADORA2B
ADRM1
AHR
APLNR
AQP9
ATP2A2
ATP2B1
ATP2C1
AXL
BDKRB1
BEST1
BST2
BTG2
C3AR1
C5AR1
CALCRL
CCL17
CCL2
CCL20
CCL22
CCL24
CCL5
CCL7
CCR7
CCRL2
CD14
CD40
CD48
CD55
CD69
CD70
CD82
CDKN1A
CHST2
CLEC5A
CMKLR1
CSF1
CSF3
CSF3R
CX3CL1
CXCL10
CXCL11
CXCL6
CXCL8
CXCL9
CXCR6
CYBB
DCBLD2
EBI3
EDN1
EIF2AK2
EMP3
EREG
F3
FFAR2
FPR1
FZD5
GABBR1
GCH1
GNA15
GNAI3
GP1BA
GPC3
GPR132
GPR183
HAS2
HBEGF
HIF1A
HPN
HRH1
ICAM1
ICAM4
ICOSLG
IFITM1
IFNAR1
IFNGR2
IL12B
IL15
IL15RA
IL18
IL18R1
IL18RAP
IL1A
IL1B
IL1R1
IL2RB
IL4R
IL6
IL7R
INHBA
IRAK2
IRF1
IRF7
ITGA5
ITGB3
ITGB8
KCNA3
KCNJ2
KCNMB2
KIF1B
KLF6
LAMP3
LCK
LCP2
LDLR
LIF
LPAR1
LTA
LY6E
LYN
MARCO
MEFV
MEP1A
MET
MMP14
MSR1
MXD1
MYC
NAMPT
NDP
NFKB1
NFKBIA
NLRP3
NMI
NMUR1
NOD2
NPFFR2
OLR1
OPRK1
OSM
OSMR
P2RX4
P2RX7
P2RY2
PCDH7
PDE4B
PDPN
PIK3R5
PLAUR
PROK2
PSEN1
PTAFR
PTGER2
PTGER4
PTGIR
PTPRE
PVR
RAF1
RASGRP1
RELA
RGS1
RGS16
RHOG
RIPK2
RNF144B
ROS1
RTP4
SCARF1
SCN1B
SELE
SELENOS
SELL
SEMA4D
SERPINE1
SGMS2
SLAMF1
SLC11A2
SLC1A2
SLC28A2
SLC31A1
SLC31A2
SLC4A4
SLC7A1
SLC7A2
SPHK1
SRI
STAB1
TACR1
TACR3
TAPBP
TIMP1
TLR1
TLR2
TLR3
TNFAIP6
TNFRSF1B
TNFRSF9
TNFSF10
TNFSF15
TNFSF9
TPBG
VIP
